# Supplementary material
Source: PubMed Central journal article supplement (PMC2890259)
Supplement: NIHMS208180-supplement-Supplement.pdf [file NIHMS208180-supplement-Supplement.pdf]

Web-based Supplementary Materials for  
 “Association Models for Clustered Data with Binary  
 and Continuous Responses”  
 By Lin, Bandyopadhyay, Lipsitz, and Sinha

## Web Appendix

We derive (10)-(11) for  $X_{ij} = 0$  in the following. When  $X_{ij} = 0$ , we have  $E[Y_{1ij}|B_i, W_i] = \exp(\beta_0 + B_i)/(1 + \exp(\beta_0 + B_i))$ , and  $E[Y_{2ij}|B_i, W_i, Y_{1ij}] = \alpha_0 + \gamma(Y_{1ij} - \pi_{1ij}) + W_i$ . Covariance between the binary responses of different subjects within the same cluster is

$$\begin{aligned} \text{Cov}[Y_{1ij}, Y_{1ij'}] &= E[(Y_{1ij} - \pi_{1ij})(Y_{1ij'} - \pi_{1ij'})] = EE[(Y_{1ij} - \pi_{1ij})(Y_{1ij'} - \pi_{1ij'})|B_i] \\ &= E[\{E(Y_{1ij} - \pi_{1ij}|B_i)\}^2] = E \left[ \left\{ \frac{\exp(\beta_0 + B_i)}{1 + \exp(\beta_0 + B_i)} - \pi_{1ij} \right\}^2 \right]. \end{aligned}$$

The covariance between the binary response and the cluster random effect for the corresponding continuous response from same subject is

$$\begin{aligned} \text{Cov}[Y_{1ij}, W_i] &= E[(Y_{1ij} - \pi_{1ij})W_i] = EE[Y_{1ij}W_i|B_i] - \pi_{1ij}E[W_i] = E[E[Y_{1ij}|B_i]E[W_i|B_i]] \\ &= E \left[ \frac{\exp(\beta_0 + B_i)}{1 + \exp(\beta_0 + B_i)} E[W_i|B_i] \right] \\ &= E \left[ \frac{\exp(\beta_0 + B_i)}{1 + \exp(\beta_0 + B_i)} W_i \right]. \end{aligned}$$
